# Supplementary material
Source: publisher figshare collection journal article supplement (https://sage.figshare.com/ndownloader/files/20080115)
Supplement: Supplementary file 2 [file 20080115]

#### GLOBAL RATING OF CHANGE

1. A very great deal better
2. A great deal better
3. A good deal better
4. Somewhat better
5. A little better
6. No change
7. A little worse
8. Somewhat worse
9. A good deal worse
10. A great deal worse
11. A very great deal worse
